# Supplementary material for: Fine-grained management of I/O optimizations based on workload characteristics
Source: Springer Nature journal article supplement (doi:10.1007/s11704-020-9344-1), 2020-12-31
Supplement: 11704_2020_9344_MOESM1_ESM.pdf [file 11704_2020_9344_MOESM1_ESM.pdf]

# Fine-grained management of I/O optimizations based on workload characteristics

**Bing WEI, Limin XIAO, Bingyu ZHOU, Guangjun QIN,  
Baicheng YAN, Zhisheng HUO**

Frontiers of Computer Science, DOI: [10.1007/s11704-020-9344-1](https://doi.org/10.1007/s11704-020-9344-1)

# Problems & Ideas

- Problems of I/O optimizations for files in parallel file systems
  - Flexible management, dynamical selection, and adaptive adjusting of I/O optimizations cannot be met
  - Selection of metadata optimization strategies cannot be satisfied
- Ideas: Extended file handle
  - Original file handle is extended to record I/O optimization information
  - Selecting I/O paths based on extended file handles
  - Adjusting I/O optimizations based on workload characteristics at run time
- **Extended file handle structure**

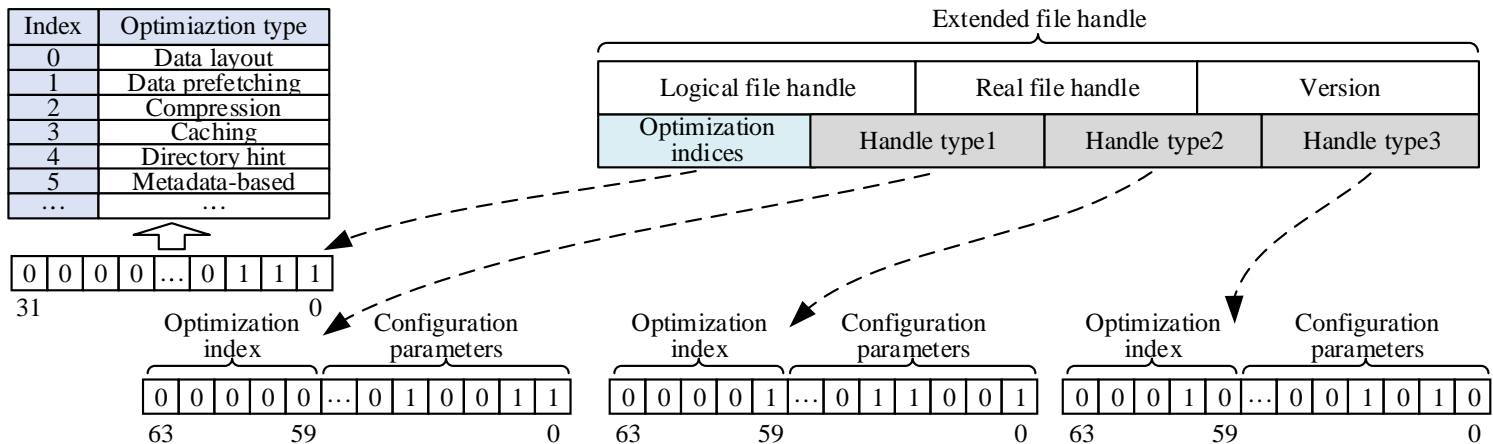

# Main Contributions

- Aggregate throughput of different prefetch methods for multiple workloads

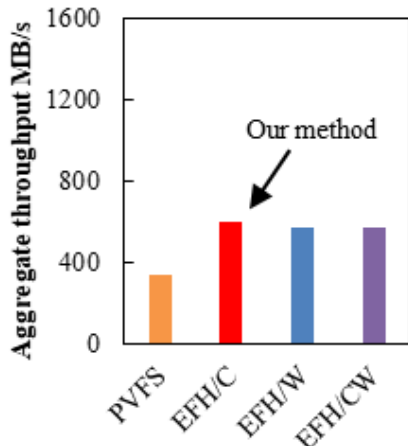

(a) IOR-SEQ workload

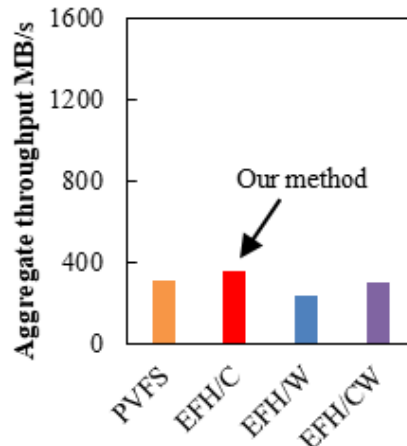

(b) IOR-STR workload

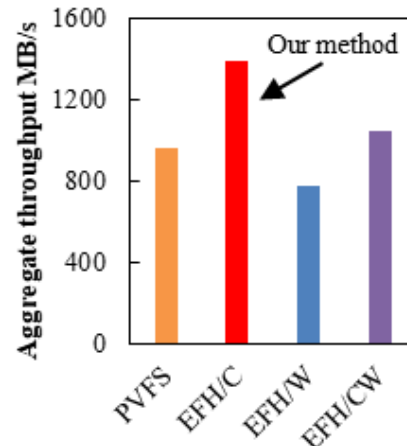

(c) LD workload

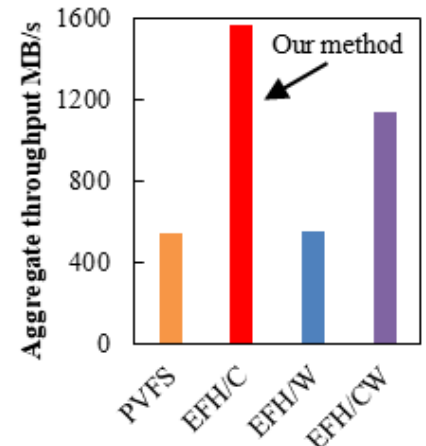

(d) CH workload

- Aggregate throughput of different small file optimization methods

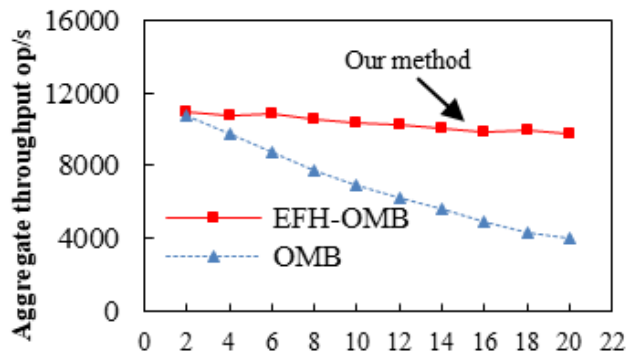

(a) metadata Number of client processes

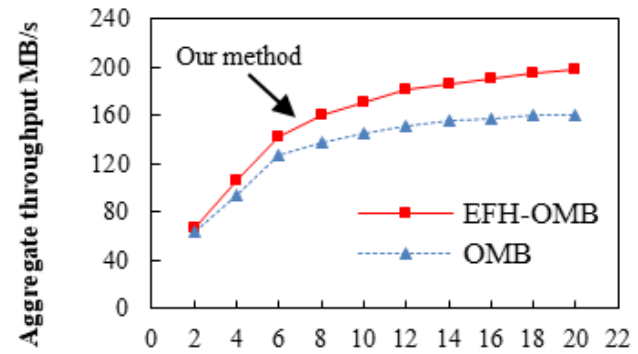

(b) data Number of client processes
